# Supplementary material
Source: publisher site journal article supplement (http://www.kjim.org/upload/media/kjim-2023-323-Supplementary-Fig-1.pdf)
Supplement: Supplementary file 1 [file kjim-2023-323-Supplementary-Fig-1.pdf]

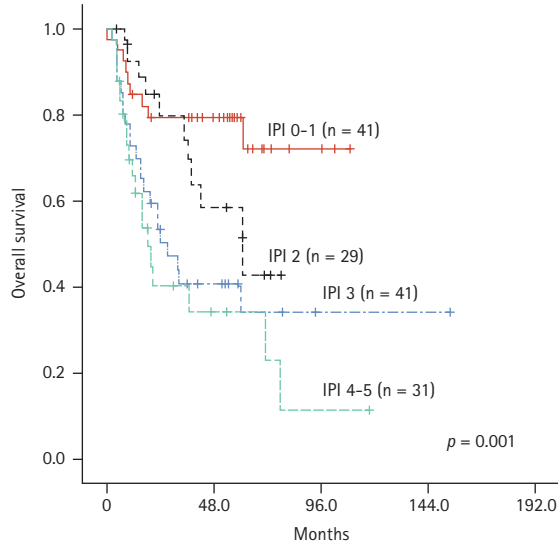

|          | IPI 0-1 | IPI 2 | IPI 3 | IPI 4-5 |
|----------|---------|-------|-------|---------|
| <b>A</b> | 41      | 29    | 41    | 31      |
|          | 21      | 10    | 10    | 4       |
|          | 2       | 0     | 0     | 0       |
|          | 0       | 0     | 0     | 0       |

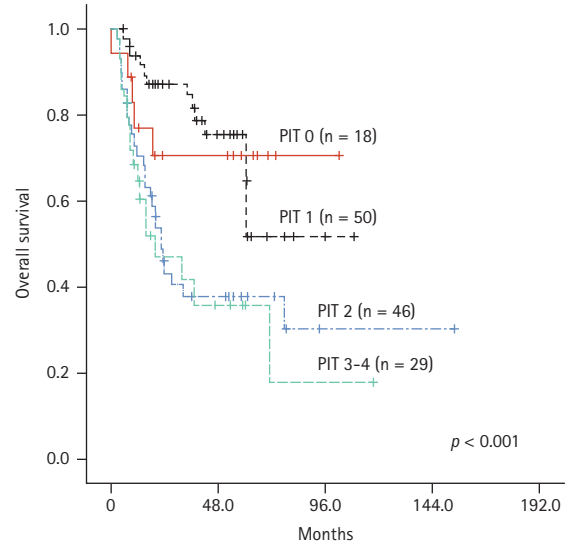

|          | PIT 0 | PIT 1 | PIT 2 | PIT 3-4 |
|----------|-------|-------|-------|---------|
| <b>B</b> | 18    | 50    | 46    | 29      |
|          | 8     | 21    | 12    | 4       |
|          | 1     | 1     | 0     | 0       |
|          | 0     | 0     | 0     | 0       |

**Supplementary Figure 1.** Overall survival according to International Prognostic Index (IPI) (A) and prognostic index for T-cell lymphoma (PIT) (B).
